# Supplementary material
Source: PubMed Central journal article supplement (PMC7688084)
Supplement: cir-142-2128-s001.pdf [file cir-142-2128-s001.pdf]

SUPPLEMENTAL MATERIAL

to

**Growth differentiation factor-15 provides prognostic information  
superior to established cardiovascular and inflammatory biomarkers  
in unselected patients hospitalized with COVID-19**

**Suppl. Table I.** Baseline characteristics stratified by quartiles of growth differentiation factor 15 (GDF-15) concentration at baseline

|                                              | <b>GDF-15 Q1</b><br>n=31 | <b>GDF-15 Q2</b><br>n=31 | <b>GDF-15 Q3</b><br>n=31 | <b>GDF-15 Q4</b><br>n=30 | <b>P-value for trend</b> |
|----------------------------------------------|--------------------------|--------------------------|--------------------------|--------------------------|--------------------------|
| <i>GDF-15</i>                                | 1170 [996, 1454]         | 2273 [1942, 2514]        | 3673 [3167, 4066]        | 7447 [5247, 9984]        |                          |
| Age, years                                   | 48.6 ± 14.6              | 60.4 ± 12.8              | 62.5 ± 12.8              | 67.3 ± 14.3              | <0.001                   |
| Male sex                                     | 14 (45.2%)               | 18 (58.1%)               | 16 (51.6%)               | 23 (76.7%)               | 0.029                    |
| White race                                   | 14 (45.2%)               | 18 (58.1%)               | 18 (58.1%)               | 18 (60.0%)               | 0.27                     |
| Body mass index, kg/m <sup>2</sup>           | 27.0 ± 4.1               | 28.9 ± 4.1               | 29.9 ± 7.9               | 27.4 ± 4.4               | 0.56                     |
| Obesity                                      | 5 (17.2%)                | 11 (35.5%)               | 10 (32.3%)               | 6 (20.7%)                | 0.85                     |
| Diabetes Mellitus                            | 1 (3.2%)                 | 1 (3.2%)                 | 6 (19.4%)                | 13 (43.3%)               | <0.001                   |
| Hypertension                                 | 3 (10.0%)                | 8 (25.8%)                | 12 (40.0%)               | 16 (53.3%)               | <0.001                   |
| Cardiovascular disease                       | 1 (3.2%)                 | 2 (6.5%)                 | 7 (22.6%)                | 8 (22.6%)                | 0.002                    |
| Chronic pulmonary disease                    | 0 (0.0%)                 | 1 (3.2%)                 | 4 (12.9%)                | 1 (3.3%)                 | 0.25                     |
| Chronic kidney disease                       | 1 (3.2%)                 | 0 (0.0%)                 | 0 (0.0%)                 | 8 (26.7%)                | <0.001                   |
| Smoking                                      | 1 (3.2%)                 | 3 (9.7%)                 | 1 (3.2%)                 | 1 (3.3%)                 | 0.73                     |
| <b>Baseline Parameters</b>                   |                          |                          |                          |                          |                          |
| Days of symptoms                             | 9.3 ± 5.4                | 10.3 ± 4.3               | 9.0 ± 4.0                | 8.6 ± 4.5                | 0.39                     |
| Oxygen saturation, %                         | 95.6 ± 2.1               | 93.6 ± 2.7               | 91.4 ± 4.1               | 90.6 ± 9.4               | <0.001                   |
| Temperature, °C                              | 38.0 ± 0.8               | 38.3 ± 0.9               | 38.3 ± 1.0               | 37.8 ± 0.8               | 0.31                     |
| Heart rate, /min                             | 89.7 ± 16.5              | 87.4 ± 13.5              | 91.4 ± 15.3              | 92.0 ± 21.0              | 0.43                     |
| Respiratory rate, /min                       | 25.5 ± 8.9               | 25.1 ± 6.6               | 28.1 ± 10.6              | 28.6 ± 7.8               | 0.08                     |
| Systolic blood pressure, mmHg                | 134.9 ± 17.7             | 132.7 ± 16.5             | 127.1 ± 15.3             | 133.5 ± 23.9             | 0.51                     |
| <b>Baseline Laboratory Values</b>            |                          |                          |                          |                          |                          |
| Hemoglobin, g/dL                             | 14.5 [13.2, 15.2]        | 14.1 [13.1, 15.0]        | 13.8 [12.4, 14.7]        | 13.1 [11.3, 14.0]        | 0.002                    |
| White blood cell count, x 10 <sup>9</sup> /L | 5.2 [4.4, 6.2]           | 5.3 [3.8, 7.9]           | 6.6 [5.5, 9.5]           | 7.9 [5.1, 10.8]          | <0.001                   |
| Lymphocyte count, x 10 <sup>9</sup> /L       | 1.3 [1.0, 1.9]           | 0.8 [0.7, 1.1]           | 1.0 [0.9, 1.3]           | 0.8 [0.7, 1.0]           | 0.002                    |
| Thrombocyte count, x 10 <sup>9</sup> /L      | 182 [144, 236]           | 179 [134, 245]           | 186 [148, 233]           | 190 [161, 262]           | 0.23                     |
| Sodium, mmol/L                               | 137 [136, 138]           | 136 [134, 138]           | 136 [135, 138]           | 135 [133, 138]           | 0.10                     |

|                                |                  |                   |                    |                    |        |
|--------------------------------|------------------|-------------------|--------------------|--------------------|--------|
| Potassium, mmol/L              | 4.1 [3.7, 4.2]   | 4.1 [3.7, 4.2]    | 4.1 [3.8, 4.4]     | 4.2 [3.9, 4.6]     | 0.037  |
| eGFR, ml/min/m <sup>1.73</sup> | 100 [87, 114]    | 89 [80, 106]      | 86 [67, 98]        | 65 [30, 90]        | <0.001 |
| Alanine transaminase, IU/L     | 32 [25, 42]      | 29 [20, 40]       | 38 [26, 53]        | 33 [25, 58]        | 0.28   |
| Bilirubin, umol/L              | 12 [8, 14]       | 10.5 [9, 14]      | 14 [11, 19]        | 11.5 [10, 15]      | 0.16   |
| Lactate dehydrogenase, U/L     | 235 [210, 290]   | 280 [230, 370]    | 360 [300, 510]     | 360 [260, 480]     | <0.001 |
| Lactate, mmol/L                | 0.9 [0.7, 1.0]   | 0.9 [0.8, 1.1]    | 1.0 [0.8, 1.3]     | 1.0 [0.7, 1.3]     | 0.12   |
| Interleukin-6, pg/mL           | 14.7 [6.8, 24.7] | 37.0 [19.6, 61.7] | 59.2 [41.5, 102.0] | 71.5 [29.1, 133.0] | <0.001 |
| C-reactive protein, mg/L       | 25 [6, 45]       | 60 [32, 130]      | 90 [60, 190]       | 110 [60, 200]      | <0.001 |
| Procalcitonin, ug/L            | 0.6 [0.4, 0.8]   | 1.0 [0.6, 1.7]    | 1.8 [1.3, 3.7]     | 2.8 [1.6, 6.0]     | <0.001 |
| Ferritin, ug/L                 | 231 [132, 384]   | 444 [244, 901]    | 710 [466, 1471]    | 691 [412, 1763]    | <0.001 |
| D-dimer, mg/L                  | 0.3 [0.3, 0.4]   | 0.5 [0.4, 0.7]    | 0.6 [0.4, 1.0]     | 1.0 [0.6, 2.0]     | <0.001 |
| Cardiac Troponin T, ng/L       | 5 [4, 7]         | 10 [5, 15]        | 12 [7, 15]         | 21 [9, 38]         | <0.001 |
| NT-proBNP, ng/L                | 30 [17, 60]      | 109 [42, 253]     | 121 [57, 265]      | 316.5 [143, 788]   | <0.001 |

Abbreviations: RAS = Renin-Angiotensin-System; NEWS = National Early Warning Score; eGFR = estimated glomerular filtration rate; NT-proBNP = N-terminal pro-B-type natriuretic peptide

**Suppl. Table II.** Spearman correlation between baseline concentrations of biomarkers

|                  | <b>GDF-15</b> | <b>IL-6</b> | <b>CRP</b> | <b>PCT</b> | <b>Ferritin</b> | <b>D-Dimer</b> | <b>cTnT</b> | <b>NT-proBNP</b> |
|------------------|---------------|-------------|------------|------------|-----------------|----------------|-------------|------------------|
| <b>IL-6</b>      | 0.50          |             |            |            |                 |                |             |                  |
| <b>CRP</b>       | 0.53          | 0.62        |            |            |                 |                |             |                  |
| <b>PCT</b>       | 0.64          | 0.69        | 0.65       |            |                 |                |             |                  |
| <b>Ferritin</b>  | 0.45          | 0.49        | 0.54       | 0.67       |                 |                |             |                  |
| <b>D-Dimer</b>   | 0.46          | 0.29        | 0.47       | 0.37       | 0.36            |                |             |                  |
| <b>cTnT</b>      | 0.52          | 0.40        | 0.31       | 0.43       | 0.25            | 0.32           |             |                  |
| <b>NT-proBNP</b> | 0.49          | 0.50        | 0.42       | 0.51       | 0.34            | 0.41           | 0.68        |                  |

All correlations were significant ( $p < 0.05$ )

Abbreviations: IL-6= interleukin 6; CRP = C-reactive protein; PCT = procalcitonin; cTnT = cardiac troponin T; NT-proBNP = N-terminal pro-B-type natriuretic peptide; GDF-15= growth differentiation factor 15

**Suppl. Table III.** Multivariable regression of baseline log<sub>2</sub>-transformed concentrations of growth differentiation factor 15

|                                    | <b>Coef. (95% CI)</b>  | <b>P-value</b> |
|------------------------------------|------------------------|----------------|
| Age, years                         | 0.019 (0.004 to 0.034) | 0.015          |
| Male sex                           |                        | 0.62           |
| White race                         | -0.42 (-0.77 to -0.08) | 0.016          |
| Body mass index, kg/m <sup>2</sup> |                        | 0.94           |
| Cardiovascular disease             |                        | 0.74           |
| log eGFR, ml/min/m <sup>1.73</sup> | -0.53 (-0.99 to -0.07) | 0.025          |
| log Interleukin-6, pg/mL           |                        | 0.49           |
| log C-reactive protein, mg/L       | 0.17 (0.003 to 0.35)   | 0.046          |
| log Procalcitonin, ug/L            | 0.25 (0.02 to 0.46)    | 0.030          |
| log Ferritin, ug/L                 |                        | 0.98           |
| log D-dimer, mg/L                  | 0.33 (0.14 to 0.52)    | 0.001          |
| log TnT, ng/L                      |                        | 0.68           |
| log NT-proBNP, ng/L                |                        | 0.54           |

Abbreviations: eGFR = estimated glomerular filtration rate; IL-6= interleukin 6; CRP = C-reactive protein; PCT = procalcitonin; cTnT = cardiac troponin T; NT-proBNP = N-terminal pro-B-type natriuretic peptide

**Suppl. Table IV.** Multivariable logistic regression of severe acute respiratory syndrome coronavirus 2 viremia at baseline, with all variables listed in the model.

|           |         | <b>OR (95% CI)</b> | <b>P-value</b> |
|-----------|---------|--------------------|----------------|
| IL-6      | (pg/mL) | 1.63 (0.97-2.74)   | 0.07           |
| CRP       | (mg/L)  | 1.61 (0.90-2.88)   | 0.29           |
| PCT       | (ug/L)  | 0.72 (0.39-1.31)   | 0.11           |
| Ferritin  | (ug/L)  | 1.58 (0.93-2.68)   | 0.09           |
| D-dimer   | (mg/L)  | 0.60 (0.34-1.06)   | 0.08           |
| cTnT      | (ng/L)  | 1.35 (0.74-2.44)   | 0.32           |
| NT-proBNP | (ng/L)  | 0.73 (0.48-1.13)   | 0.16           |
| GDF-15    | (pg/mL) | 1.96 (0.14-3.35)   | 0.014          |

All biomarker values were log-2 transformed in the adjusted regression model.

Abbreviations: IL-6= interleukin 6; CRP = C-reactive protein; PCT = procalcitonin; cTnT = cardiac troponin T; NT-proBNP = N-terminal pro-B-type natriuretic peptide; GDF-15= growth differentiation factor 1

**Suppl. Table V.** Concentrations of baseline cardiovascular and inflammatory biomarkers and the association with all cause death among patients hospitalized with COVID-19 (n=123)

|                  | <b>Survivor<br/>(n=115)</b> | <b>Non-survivor<br/>(n=8)</b> | <b>P-value<br/>unadjusted</b> | <b>ROC AUC<br/>(95% CI)</b> | <b>P-value adj.<br/>Model 1</b> |
|------------------|-----------------------------|-------------------------------|-------------------------------|-----------------------------|---------------------------------|
| IL-6 (pg/mL)     | 38.3 [17.5, 63.4]           | 108.5 [32.5, 186]             | 0.037                         | 0.72 (0.53-0.91)            | 0.67                            |
| CRP (mg/L)       | 60 [30, 130]                | 115 [75, 200]                 | 0.11                          | 0.67 (0.48-0.86)            | 0.58                            |
| PCT (ug/L)       | 1.3 [0.6, 2.3]              | 1.9 [1.4, 7.4]                | 0.06                          | 0.70 (0.54-0.86)            | 0.95                            |
| Ferritin (ug/L)  | 469 [231, 919]              | 1142 [434, 1852.5]            | 0.07                          | 0.69 (0.50-0.88)            | 0.67                            |
| D-dimer (mg/L)   | 0.5 [0.3, 0.9]              | 1.1 [0.9, 2.4]                | 0.009                         | 0.78 (0.63-0.92)            | 0.25                            |
| cTnT (ng/L)      | 8 [5, 14]                   | 24.5 [18, 30]                 | 0.001                         | 0.84 (0.75-0.92)            | 0.40                            |
| NT-proBNP (ng/L) | 97 [35, 242]                | 359 [192, 1431]               | 0.021                         | 0.74 (0.57-0.92)            | 0.73                            |
| GDF-15 (pg/mL)   | 2583 [1512, 4225]           | 7790 [4716, 9317]             | <0.001                        | 0.87 (0.79-0.94)            | 0.027                           |

Model 1: Adjusted for age, sex, race, body mass index, cardiovascular disease and estimated glomerular filtration rate  
Concentrations are reported as median (Q1, Q3). All biomarker values were log transformed in the adjusted regression model.

Abbreviations: IL-6= interleukin 6; CRP = C-reactive protein; PCT = procalcitonin; cTnT = cardiac troponin T; NT-proBNP = N-terminal pro-B-type natriuretic peptide; GDF-15= growth differentiation factor 15; ROC AUC = area under the receiver operating curves

**Suppl. Figure I.** Flow diagram of patients in the COVID MECH study

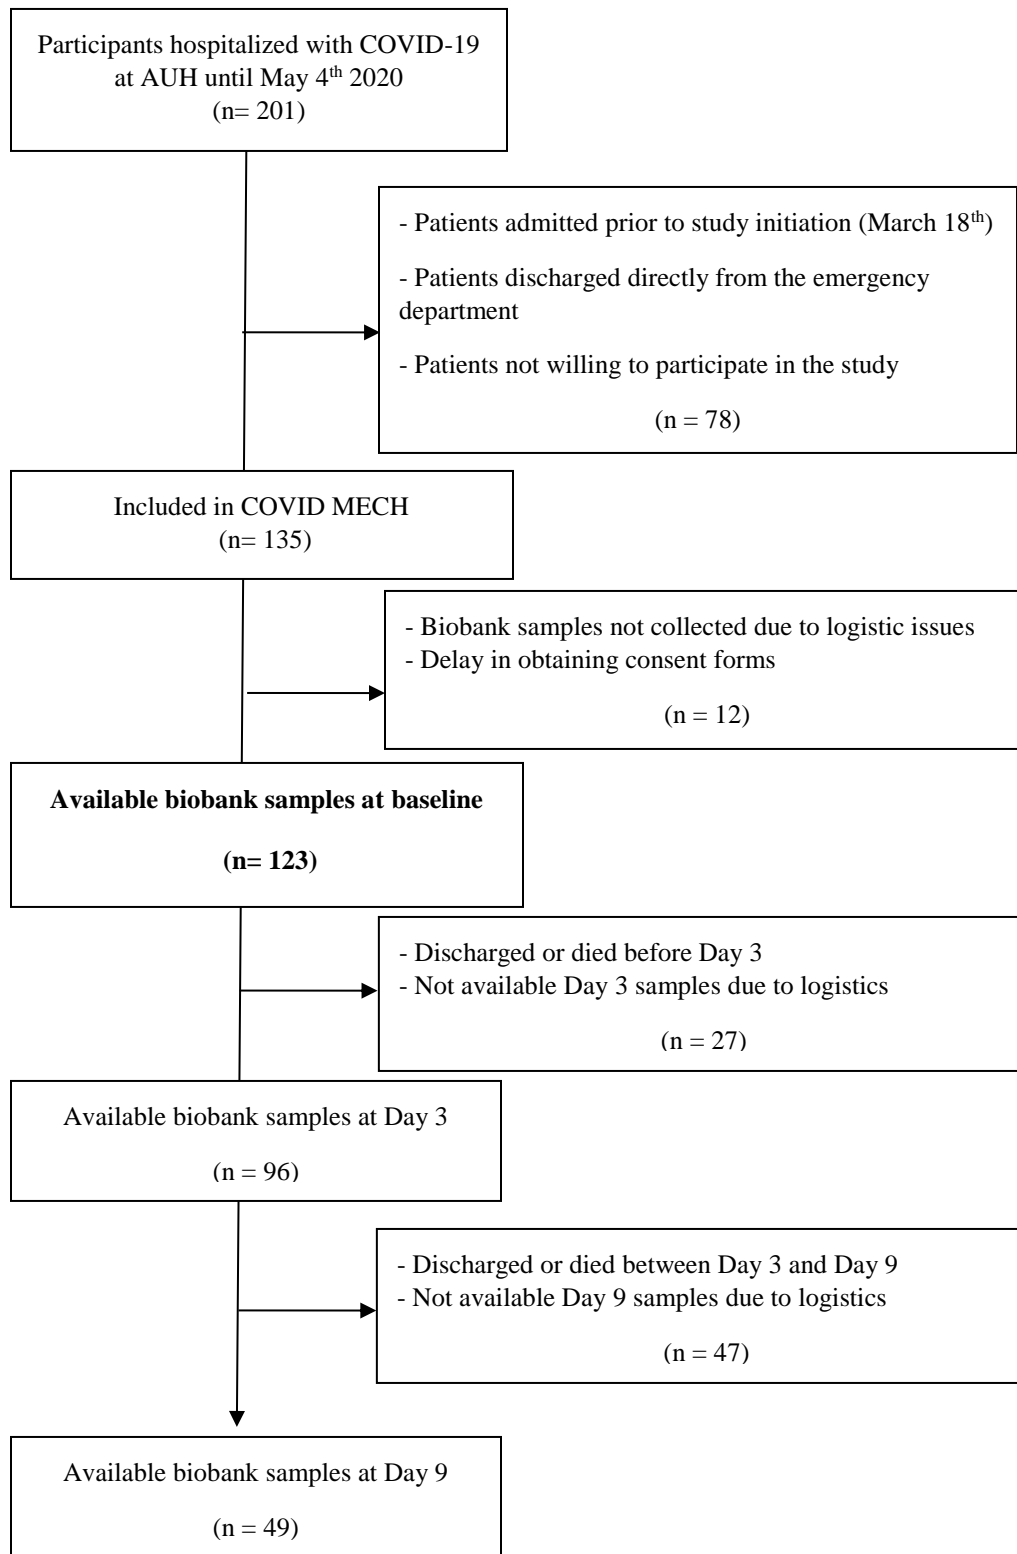



**Suppl. Figure II.** Association between oxygen saturation and log transformed growth differentiation factor 15 at baseline

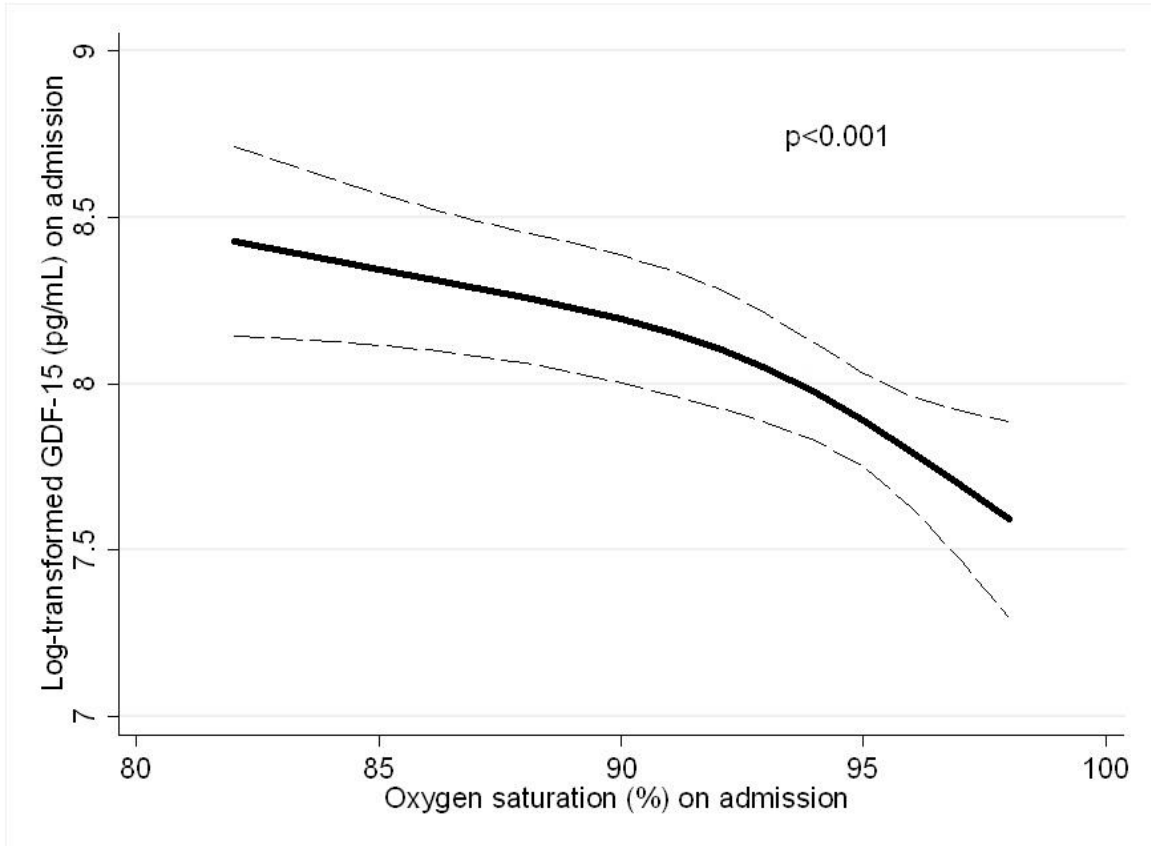

**Suppl. Figure III.** Distributions of the cardiovascular and inflammatory biomarkers by the *primary endpoint*.

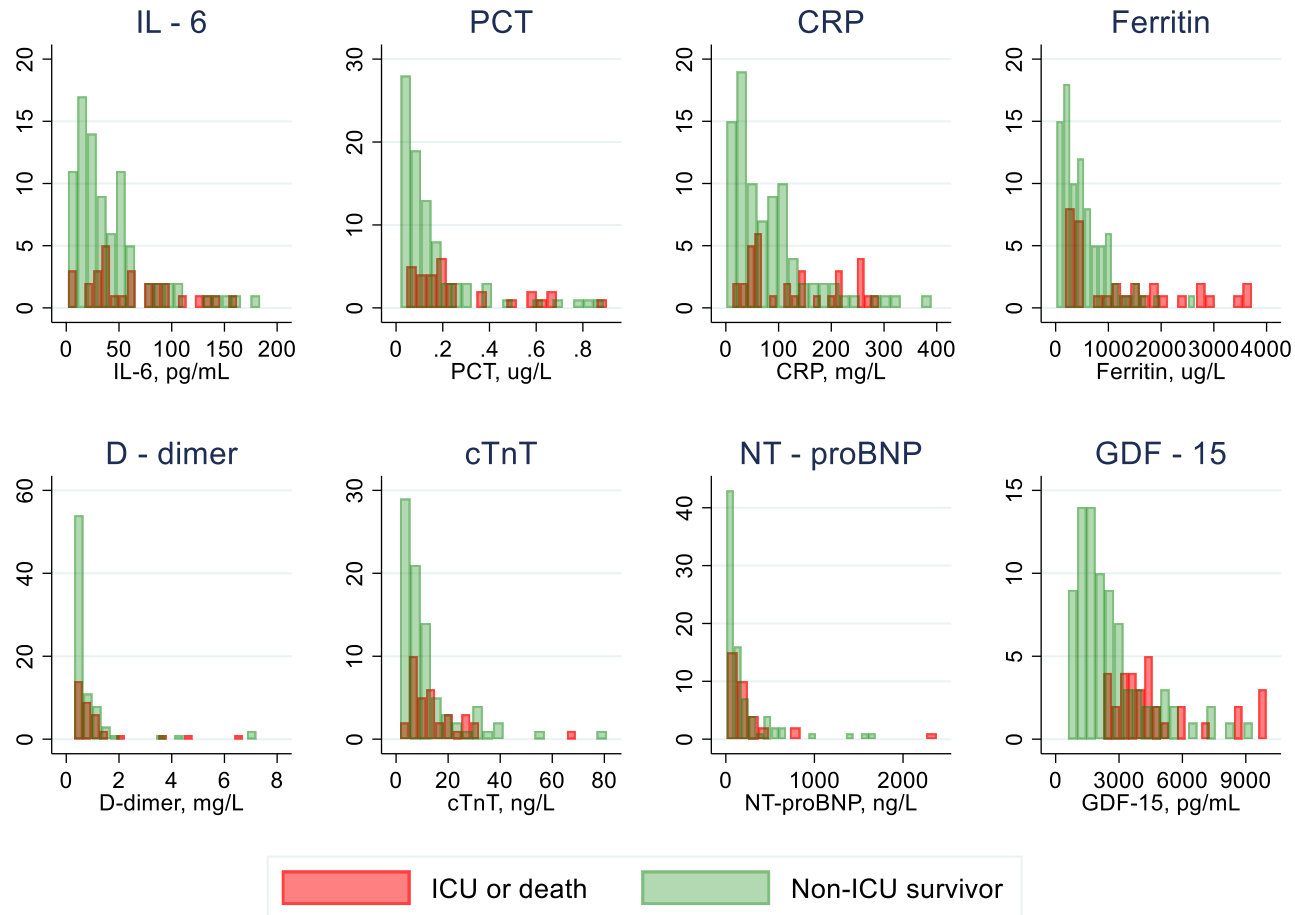

Outliers are excluded from the histograms for visual presentation purposes: n=8 with IL-6 >200 pg/mL; n=6 with PCT>1.0 ug/L; n=2 with CRP>400 mg/L; n=2 with ferritin>5000 ug/L; n=3 with D-dimer>10 mg/L; n=4 with cTnT>100 ng/L; n=6 with NT-proBNP>2500 ng/L and n=7 with GDF-15 >10 000 pg/mL

**Suppl. Figure IV.** Distributions of the cardiovascular and inflammatory biomarkers by *all-cause death*

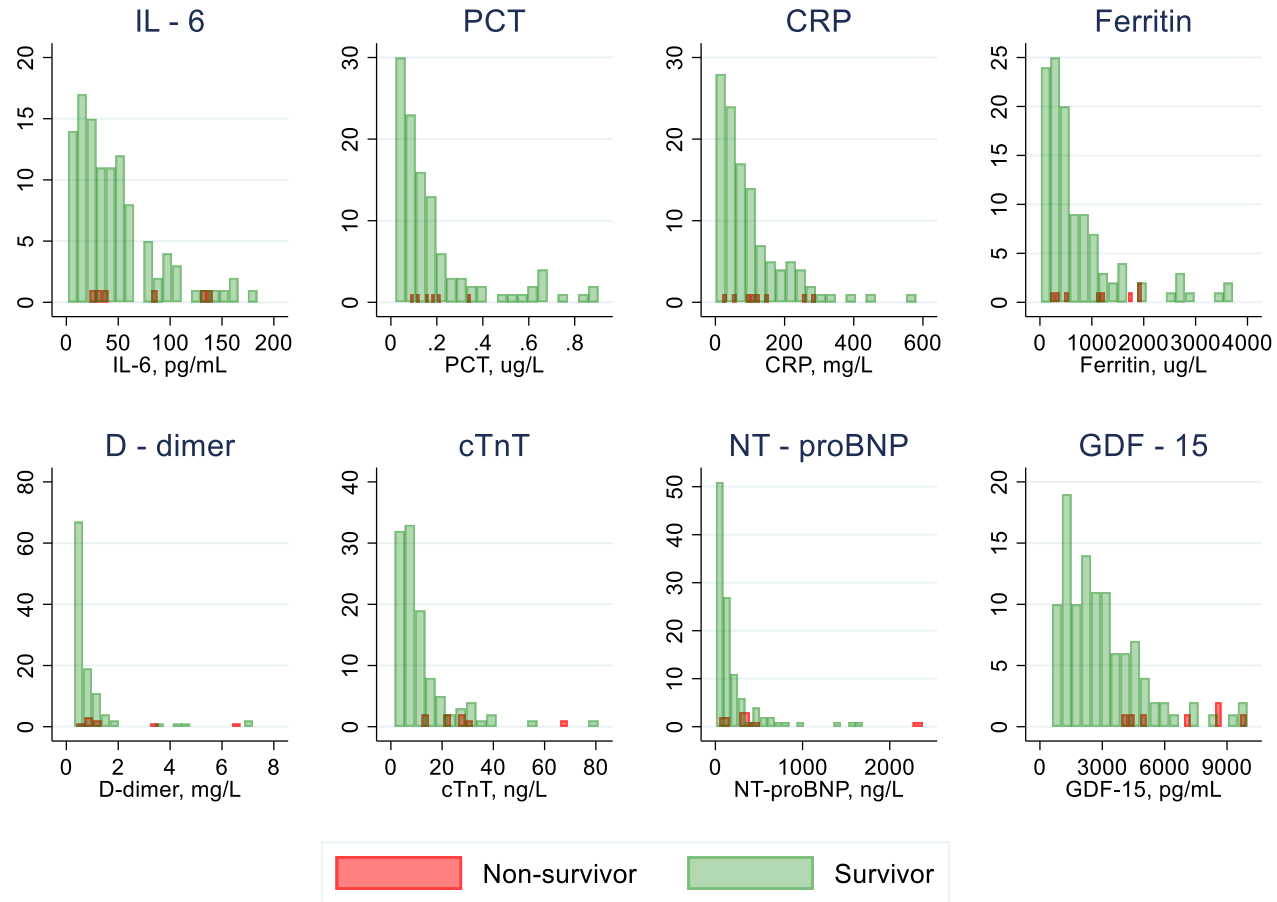

Outliers are excluded from the histograms for visual presentation purposes: n=8 with IL-6 >200 pg/mL; n=6 with PCT>1.0 ug/L; n=2 with CRP>400 mg/L; n=2 with ferritin>5000 ug/L; n=3 with D-dimer>10 mg/L; n=4 with cTnT>100 ng/L; n=6 with NT-proBNP>2500 ng/L and n=7 with GDF-15 >10 000 pg/mL

**Suppl. Figure V.** Distributions of changes in GDF-15 and IL-6 from baseline to day 3 by the primary endpoint

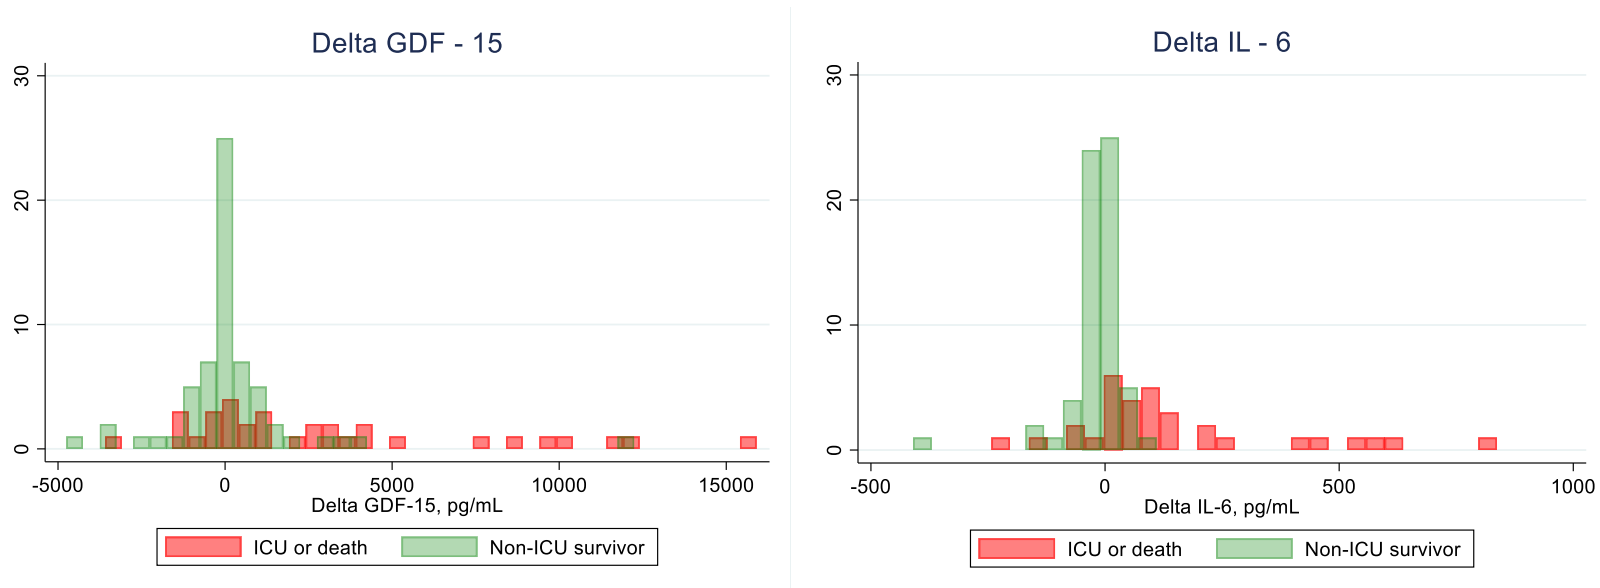

Outliers are excluded from the histograms for visual presentation purposes: n=1 with delta GDF-15 < -10000 and n=1 with delta IL-6 >2000 pg/m
